# Supplementary material
Source: PubMed Central journal article supplement (PMC4577894)
Supplement: JVI.01522-15_zjv999090796so8.pdf [file JVI.01522-15_zjv999090796so8.pdf]

## **SUPPLEMENTAL MATERIAL**

Movie S1. Tomogram and Tomo-bubblegram of the virion shown in Fig. 6B.

Movie S2. Tomogram and Tomo-bubblegram of the virion shown in Fig. 6I.

Movie S3. Tomogram and Tomo-bubblegram of the virion shown in Fig. 6R.

Movie S4. Tomogram and Tomo-bubblegram of the virion shown in Fig. 6X.

Movie S5. Tomogram and Tomo-bubblegram of the virion shown in Fig. 7Aii.

Movie S6. Tomogram and Tomo-bubblegram of the virion shown in Fig. 7Aiii.

Movie S7. Tomogram and Tomo-bubblegram of the virion shown in Fig. 7Avi.
